# Supplementary material for: Iron Bioavailability from Ferrous Ammonium Phosphate, Ferrous Sulfate, and Ferric Pyrophosphate in an Instant Milk Drink—A Stable Isotope Study in Children
Source: MDPI journal article supplement (doi:10.3390/nu14081640), 2022-04-14
Supplement: s1 [file s1]

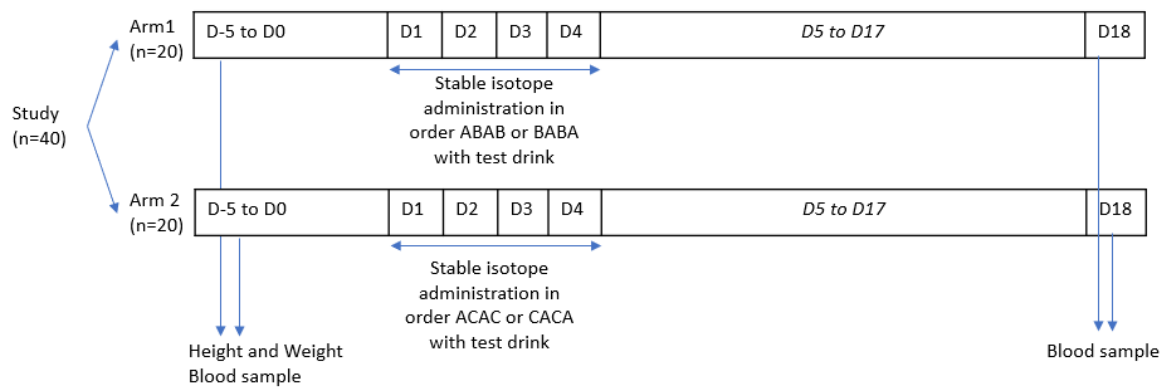

**Figure S1.** Study design. Stable isotopes were administered over 4 alternative day with the test drink (milk) i.e., A: ferrous sulfate labelled with  $^{58}\text{Fe}$ , B: ferrous ammonium phosphate labelled with  $^{57}\text{Fe}$ , C ferric pyrophosphate labelled with  $^{57}\text{Fe}$ , after the subjects had fasted overnight.
